# Supplementary material for: Time-Restricted Feeding Modifies the Fecal Lipidome and the Gut Microbiota
Source: MDPI journal article supplement (doi:10.3390/nu15071562), 2023-03-23
Supplement: s1 [file s1]

**Supplemental Table S1.** Spearman's rho values between fecal microbial phyla and fatty acids for each diet: CTRL-AL, HF-AL, and HF-TRF (n=14 for each group). Blue shading highlights statistically significant negative Spearman's Rho. Green shading indicates positive associations. Normal font indicates  $p < 0.05$ ; bold font indicates  $p < 0.01$ .

| SFA                   | Actinobacteria |       |        | Bacteroidetes |       |        | Deferribacteres |       |        | Firmicutes |       |        | Verrucomicrobia |       |        |
|-----------------------|----------------|-------|--------|---------------|-------|--------|-----------------|-------|--------|------------|-------|--------|-----------------|-------|--------|
|                       | CTRL-AL        | HF-AL | HF-TRF | CTRL-AL       | HF-AL | HF-TRF | CTRL-AL         | HF-AL | HF-TRF | CTRL-AL    | HF-AL | HF-TRF | CTRL-AL         | HF-AL | HF-TRF |
| 12:0                  | -0.34          | -0.60 | -0.01  | 0.30          | 0.63  | 0.13   | -0.11           | -0.02 | -0.43  | -0.03      | -0.30 | -0.15  | -0.27           | -0.24 | 0.27   |
| 14:0                  | -0.05          | -0.54 | 0.07   | 0.44          | 0.61  | 0.10   | -0.48           | 0.04  | -0.42  | -0.43      | -0.27 | -0.16  | -0.18           | -0.11 | 0.38   |
| 15:0                  | 0.11           | -0.29 | -0.09  | 0.31          | 0.34  | 0.43   | -0.52           | 0.20  | -0.67  | -0.35      | -0.21 | -0.53  | -0.22           | 0.25  | 0.39   |
| 16:0                  | -0.09          | -0.57 | 0.03   | 0.54          | 0.58  | 0.08   | -0.57           | -0.09 | -0.42  | -0.44      | -0.28 | -0.13  | -0.37           | -0.13 | 0.34   |
| 17:0                  | -0.16          | -0.59 | -0.01  | 0.46          | 0.62  | 0.09   | -0.54           | -0.05 | -0.48  | -0.36      | -0.32 | -0.18  | -0.18           | -0.12 | 0.41   |
| 18:0                  | -0.10          | -0.61 | 0.00   | 0.55          | 0.60  | 0.11   | -0.59           | -0.09 | -0.46  | -0.50      | -0.32 | -0.13  | -0.29           | -0.14 | 0.31   |
| 20:0                  | -0.25          | -0.53 | -0.03  | 0.60          | 0.58  | 0.01   | -0.57           | -0.17 | -0.44  | -0.69      | -0.37 | -0.06  | 0.11            | -0.11 | 0.31   |
| 21:0                  | 0.07           | -0.11 | -0.14  | -0.07         | -0.04 | -0.15  | 0.02            | -0.10 | -0.55  | -0.10      | -0.15 | 0.07   | 0.42            | 0.06  | 0.17   |
| 23:0                  | -0.39          | -0.41 | -0.16  | 0.40          | 0.17  | -0.08  | -0.34           | 0.03  | -0.53  | -0.35      | -0.05 | 0.07   | -0.01           | -0.08 | 0.13   |
| 24:0                  | -0.26          | -0.47 | -0.10  | 0.48          | 0.33  | -0.09  | -0.40           | -0.04 | -0.49  | -0.52      | -0.17 | 0.06   | 0.19            | -0.13 | 0.22   |
| <b>Total SFA</b>      | -0.10          | -0.57 | 0.02   | 0.58          | 0.59  | 0.08   | -0.58           | -0.09 | -0.43  | -0.49      | -0.30 | -0.12  | -0.29           | -0.11 | 0.32   |
| <b>BCFA</b>           |                |       |        |               |       |        |                 |       |        |            |       |        |                 |       |        |
| 13:0, 12-Me           | -0.20          | -0.09 | -0.17  | 0.47          | 0.42  | 0.17   | -0.51           | 0.00  | -0.30  | -0.56      | -0.61 | -0.63  | 0.56            | 0.72  | 0.88   |
| 14:0, 13-Me           | -0.14          | -0.38 | -0.03  | 0.69          | 0.36  | 0.18   | -0.60           | 0.17  | -0.39  | -0.69      | -0.30 | -0.52  | -0.03           | 0.59  | 0.79   |
| 14:0, 12-Me           | -0.01          | -0.27 | -0.11  | 0.49          | 0.59  | 0.21   | -0.67           | -0.10 | -0.37  | -0.60      | -0.60 | -0.58  | 0.05            | 0.63  | 0.81   |
| 15:0, 14-Me           | 0.02           | -0.64 | 0.10   | 0.35          | 0.56  | 0.08   | -0.34           | 0.17  | -0.55  | -0.35      | -0.45 | -0.34  | -0.02           | 0.27  | 0.69   |
| 16:0, 15-Me           | 0.06           | -0.37 | 0.07   | 0.33          | 0.29  | 0.37   | -0.40           | 0.12  | -0.80  | -0.13      | -0.28 | -0.44  | -0.53           | 0.51  | 0.36   |
| 16:0, 14-Me           | -0.08          | -0.48 | 0.20   | 0.44          | 0.79  | 0.47   | -0.28           | -0.18 | -0.39  | -0.36      | -0.60 | -0.58  | -0.10           | 0.17  | 0.44   |
| 17:0, 16-Me           | -0.02          | -0.34 | 0.08   | 0.59          | 0.66  | 0.24   | -0.52           | -0.12 | -0.67  | -0.58      | -0.59 | -0.23  | -0.18           | 0.47  | 0.16   |
| 21:0, 18-Me           | -0.11          | -0.65 | 0.13   | 0.58          | 0.57  | -0.12  | -0.58           | 0.06  | -0.27  | -0.68      | -0.30 | -0.01  | 0.26            | -0.17 | 0.45   |
| <b>Total BCFA</b>     | -0.05          | -0.42 | 0.13   | 0.55          | 0.64  | 0.26   | -0.64           | -0.04 | -0.45  | -0.62      | -0.62 | -0.49  | 0.08            | 0.61  | 0.69   |
| <b>MUFA</b>           |                |       |        |               |       |        |                 |       |        |            |       |        |                 |       |        |
| 16:1n-7, Z            | 0.09           | -0.34 | 0.11   | 0.52          | 0.73  | 0.49   | -0.58           | -0.15 | -0.64  | -0.51      | -0.63 | -0.59  | -0.12           | 0.34  | 0.43   |
| 18:1n-9,E             | -0.26          | -0.56 | -0.27  | 0.65          | 0.65  | 0.08   | -0.64           | 0.07  | -0.74  | -0.57      | -0.43 | -0.07  | 0.03            | 0.23  | 0.19   |
| 18:1n-9,Z             | -0.13          | -0.59 | -0.01  | 0.42          | 0.65  | 0.16   | -0.42           | -0.03 | -0.47  | -0.30      | -0.35 | -0.15  | -0.19           | -0.12 | 0.26   |
| 18:1n-7, Z            | 0.12           | -0.49 | 0.01   | 0.32          | 0.75  | 0.31   | -0.50           | -0.09 | -0.62  | -0.32      | -0.56 | -0.38  | -0.33           | 0.23  | 0.41   |
| 18:1n-6, Z            | 0.39           | -0.01 | -0.07  | -0.17         | 0.41  | 0.29   | -0.22           | 0.02  | -0.18  | 0.05       | -0.43 | -0.50  | -0.22           | 0.37  | 0.51   |
| 20:1n-9               | -0.08          | -0.65 | 0.07   | 0.56          | 0.54  | -0.06  | -0.35           | 0.05  | -0.34  | -0.75      | -0.32 | -0.06  | 0.23            | -0.10 | 0.43   |
| 22:1n-9               | -0.50          | 0.06  | 0.25   | 0.41          | -0.21 | 0.17   | -0.27           | 0.31  | -0.43  | -0.25      | 0.21  | -0.07  | 0.46            | -0.08 | -0.10  |
| 24:1n-9               | -0.10          | -0.41 | -0.22  | 0.35          | -0.08 | -0.16  | -0.39           | 0.35  | -0.48  | -0.46      | 0.11  | 0.13   | 0.14            | -0.06 | 0.06   |
| <b>Total MUFA</b>     | -0.22          | -0.63 | -0.10  | 0.53          | 0.64  | 0.19   | -0.60           | 0.04  | -0.55  | -0.46      | -0.28 | -0.21  | -0.12           | -0.10 | 0.32   |
| <b>n-6 PUFA</b>       |                |       |        |               |       |        |                 |       |        |            |       |        |                 |       |        |
| 18:2, 9Z,11E          | 0.12           | -0.17 | 0.12   | 0.29          | 0.15  | -0.30  | -0.29           | -0.21 | -0.39  | -0.45      | -0.26 | 0.24   | 0.19            | -0.06 | 0.02   |
| 18:2 Z/Z              | 0.16           | 0.06  | -0.01  | -0.42         | 0.18  | 0.08   | 0.04            | 0.14  | -0.32  | 0.31       | -0.32 | -0.22  | -0.29           | 0.10  | 0.22   |
| 18:2n-6, Z,Z          | -0.02          | -0.44 | 0.12   | 0.19          | 0.55  | 0.12   | -0.25           | -0.18 | -0.32  | -0.18      | -0.26 | -0.19  | -0.23           | -0.16 | 0.39   |
| 20:3n-6               | -0.39          | -0.49 | -0.14  | 0.49          | 0.40  | -0.21  | -0.53           | 0.03  | -0.42  | -0.47      | -0.28 | 0.16   | 0.19            | -0.04 | 0.22   |
| 20:4n-6               | 0.17           | -0.38 | 0.04   | 0.16          | 0.33  | -0.45  | -0.10           | -0.05 | -0.12  | -0.42      | -0.28 | 0.19   | 0.47            | -0.04 | 0.46   |
| 22:4n-6               | -0.11          | -0.45 | 0.41   | 0.23          | 0.09  | -0.02  | -0.33           | 0.15  | -0.04  | -0.40      | -0.05 | 0.15   | 0.27            | 0.21  | -0.08  |
| 22:5n-6               | 0.03           | 0.04  | -0.19  | 0.10          | 0.00  | -0.04  | -0.52           | -0.36 | -0.56  | -0.31      | -0.11 | 0.05   | 0.04            | -0.05 | 0.12   |
| <b>Total n-6 PUFA</b> | -0.11          | -0.56 | 0.07   | 0.37          | 0.57  | -0.05  | -0.53           | -0.08 | -0.32  | -0.45      | -0.37 | -0.04  | 0.17            | -0.07 | 0.41   |
| <b>n-3 PUFA</b>       |                |       |        |               |       |        |                 |       |        |            |       |        |                 |       |        |
| 18:3n-3               | -0.11          | -0.49 | 0.04   | 0.23          | 0.55  | 0.13   | -0.22           | -0.18 | -0.40  | -0.21      | -0.20 | -0.16  | -0.12           | -0.29 | 0.31   |
| 20:5n-3               | 0.02           | -0.10 | 0.14   | 0.16          | 0.00  | -0.34  | -0.37           | 0.06  | -0.31  | -0.25      | -0.15 | 0.30   | 0.12            | 0.08  | -0.05  |
| 22:5n-3               | -0.17          | 0.16  | 0.26   | 0.18          | -0.11 | 0.18   | -0.35           | -0.05 | -0.31  | -0.39      | 0.23  | -0.27  | 0.24            | 0.22  | 0.51   |
| 22:6n-3               | -0.31          | 0.31  | 0.11   | 0.22          | -0.28 | -0.18  | -0.35           | 0.04  | -0.47  | -0.24      | 0.12  | 0.24   | 0.45            | -0.01 | -0.19  |

|                       |       |       |      |      |      |       |       |       |       |       |       |       |       |       |      |
|-----------------------|-------|-------|------|------|------|-------|-------|-------|-------|-------|-------|-------|-------|-------|------|
| <b>Total n-3 PUFA</b> | -0.09 | -0.49 | 0.13 | 0.18 | 0.52 | -0.11 | -0.39 | -0.15 | -0.29 | -0.25 | -0.25 | 0.03  | 0.23  | -0.24 | 0.37 |
| <b>Total FA</b>       | -0.14 | -0.58 | 0.02 | 0.64 | 0.59 | 0.08  | -0.63 | -0.07 | -0.43 | -0.59 | -0.28 | -0.12 | -0.14 | -0.12 | 0.32 |

AL, ad libitum; CTRL, control diet; HF, high fat diet; TRF, time-restricted feeding; BCFA, branched-chain fatty acids; FA, fatty acids; MUFA, monounsaturated fatty acids; PUFA, polyunsaturated fatty acids; SFA, saturated fatty acids.

**Supplemental Table S2.** Spearman's rho values between fecal microbial families and fatty acids. Blue shading highlights statistically significant negative Spearman's Rho. Green shading indicates positive associations. Normal font indicates  $p < 0.05$ ; bold font indicates  $p < 0.01$ .

| SFA             | <i>Bifidobacteriaceae</i> |              |        | <i>Bacteroidaceae</i> |             |        | <i>Tannerellaceae</i> |             |        | <i>Deferribacteraceae</i> |       |              | <i>Clostridiaceae</i> |       |             | <i>Lachnospiraceae</i> |              |              | <i>Desulfovibrionaceae</i> |              |              | <i>Akkermansiaceae</i> |             |             |
|-----------------|---------------------------|--------------|--------|-----------------------|-------------|--------|-----------------------|-------------|--------|---------------------------|-------|--------------|-----------------------|-------|-------------|------------------------|--------------|--------------|----------------------------|--------------|--------------|------------------------|-------------|-------------|
|                 | CTRL-<br>ad libitum       | HF-AL        | HF-TRF | CTRL-<br>ad libitum   | HF-AL       | HF-TRF | CTRL-<br>ad libitum   | HF-AL       | HF-TRF | CTRL-<br>ad libitum       | HF-AL | HF-TRF       | CTRL-<br>ad libitum   | HF-AL | HF-TRF      | CTRL-<br>ad libitum    | HF-AL        | HF-TRF       | CTRL-<br>ad libitum        | HF-AL        | HF-TRF       | CTRL-<br>ad libitum    | HF-AL       | HF-TRF      |
| 12:0            | -0.22                     | -0.65        | NA     | 0.30                  | 0.64        | 0.29   | 0.06                  | 0.28        | 0.02   | -0.11                     | -0.02 | -0.43        | 0.33                  | 0.32  | <b>0.83</b> | 0.22                   | -0.06        | 0.01         | -0.26                      | -0.56        | -0.40        | -0.27                  | -0.24       | 0.27        |
| 14:0            | 0.02                      | -0.55        | NA     | 0.57                  | <b>0.67</b> | 0.29   | 0.36                  | 0.31        | 0.00   | -0.48                     | 0.04  | -0.42        | 0.50                  | 0.35  | <b>0.83</b> | -0.21                  | -0.05        | 0.01         | -0.52                      | -0.57        | -0.41        | -0.18                  | -0.11       | 0.38        |
| 15:0            | 0.10                      | -0.30        | NA     | 0.58                  | 0.50        | 0.43   | 0.48                  | <b>0.71</b> | 0.44   | -0.52                     | 0.20  | <b>-0.67</b> | 0.27                  | -0.06 | 0.03        | -0.45                  | -0.46        | -0.39        | -0.34                      | -0.03        | <b>-0.71</b> | -0.22                  | 0.25        | 0.39        |
| 16:0            | 0.02                      | -0.62        | NA     | 0.60                  | 0.63        | 0.27   | 0.44                  | 0.25        | -0.01  | -0.57                     | -0.09 | -0.42        | 0.51                  | 0.30  | <b>0.82</b> | -0.22                  | 0.02         | 0.04         | -0.55                      | -0.56        | -0.42        | -0.37                  | -0.13       | 0.34        |
| 17:0            | -0.21                     | -0.65        | NA     | 0.59                  | <b>0.71</b> | 0.31   | 0.33                  | 0.41        | 0.01   | -0.54                     | -0.05 | -0.48        | 0.49                  | 0.28  | <b>0.78</b> | -0.35                  | -0.05        | 0.00         | -0.49                      | -0.53        | -0.48        | -0.18                  | -0.12       | 0.41        |
| 18:0            | -0.01                     | -0.64        | NA     | 0.56                  | 0.65        | 0.28   | 0.38                  | 0.28        | 0.01   | -0.59                     | -0.09 | -0.46        | 0.56                  | 0.33  | <b>0.82</b> | -0.35                  | -0.01        | 0.03         | -0.57                      | -0.56        | -0.44        | -0.29                  | -0.14       | 0.31        |
| 20:0            | -0.18                     | -0.59        | NA     | 0.61                  | 0.65        | 0.24   | 0.56                  | 0.34        | -0.05  | -0.57                     | -0.17 | -0.44        | 0.27                  | 0.26  | <b>0.79</b> | <b>-0.73</b>           | -0.05        | 0.11         | -0.57                      | -0.51        | -0.43        | 0.11                   | -0.11       | 0.31        |
| 21:0            | -0.08                     | -0.05        | NA     | -0.01                 | 0.17        | 0.04   | 0.08                  | 0.20        | 0.00   | 0.02                      | -0.10 | <b>-0.55</b> | -0.42                 | -0.01 | 0.31        | -0.54                  | 0.14         | 0.22         | 0.14                       | 0.11         | -0.63        | 0.42                   | 0.06        | 0.17        |
| 23:0            | -0.31                     | -0.47        | NA     | 0.48                  | 0.40        | 0.07   | 0.42                  | 0.34        | -0.03  | -0.34                     | 0.03  | -0.53        | 0.26                  | -0.04 | 0.44        | <b>-0.66</b>           | 0.16         | 0.23         | -0.36                      | 0.01         | -0.63        | -0.01                  | -0.08       | 0.13        |
| 24:0            | -0.20                     | <b>-0.57</b> | NA     | 0.51                  | 0.48        | 0.12   | 0.54                  | 0.34        | -0.09  | -0.40                     | -0.04 | -0.49        | 0.09                  | 0.00  | 0.58        | <b>-0.73</b>           | 0.09         | 0.24         | -0.44                      | -0.13        | <b>-0.59</b> | 0.19                   | -0.13       | 0.22        |
| Total           | 0.01                      | <b>-0.62</b> | NA     | 0.66                  | 0.64        | 0.26   | 0.51                  | 0.27        | -0.01  | <b>-0.58</b>              | -0.09 | -0.43        | 0.46                  | 0.32  | <b>0.81</b> | -0.31                  | 0.00         | 0.05         | <b>-0.58</b>               | <b>-0.58</b> | -0.43        | -0.29                  | -0.11       | 0.32        |
| <b>BCFA</b>     |                           |              |        |                       |             |        |                       |             |        |                           |       |              |                       |       |             |                        |              |              |                            |              |              |                        |             |             |
| 13:0, 12-Me     | -0.29                     | 0.22         | NA     | <b>0.68</b>           | 0.41        | 0.34   | 0.48                  | 0.50        | 0.44   | -0.51                     | 0.00  | -0.30        | 0.05                  | 0.37  | -0.03       | <b>-0.70</b>           | -0.61        | -0.53        | -0.46                      | -0.26        | -0.39        | 0.56                   | <b>0.72</b> | <b>0.88</b> |
| 14:0, 13-Me     | -0.08                     | -0.12        | NA     | <b>0.82</b>           | 0.50        | 0.27   | <b>0.73</b>           | 0.46        | 0.36   | -0.60                     | 0.17  | -0.39        | 0.28                  | 0.07  | 0.22        | -0.56                  | -0.29        | -0.37        | <b>-0.69</b>               | -0.17        | -0.46        | -0.03                  | 0.59        | <b>0.79</b> |
| 14:0, 12-Me     | 0.09                      | -0.06        | NA     | <b>0.78</b>           | <b>0.73</b> | 0.35   | <b>0.73</b>           | <b>0.69</b> | 0.43   | <b>-0.67</b>              | -0.10 | -0.37        | 0.13                  | 0.45  | 0.09        | -0.50                  | <b>-0.57</b> | -0.43        | -0.49                      | -0.42        | <b>-0.54</b> | 0.05                   | 0.63        | <b>0.81</b> |
| 15:0, 14-Me     | 0.00                      | -0.46        | NA     | 0.40                  | <b>0.67</b> | 0.24   | 0.33                  | <b>0.68</b> | 0.15   | -0.34                     | 0.17  | <b>-0.55</b> | 0.26                  | 0.40  | 0.37        | <b>-0.58</b>           | <b>-0.37</b> | -0.18        | -0.39                      | -0.30        | -0.51        | -0.02                  | 0.27        | <b>0.69</b> |
| 16:0, 15-Me     | 0.12                      | -0.13        | NA     | 0.28                  | 0.38        | 0.37   | 0.34                  | 0.46        | 0.45   | -0.40                     | 0.12  | <b>-0.80</b> | 0.43                  | 0.02  | 0.37        | -0.07                  | -0.09        | -0.36        | -0.40                      | -0.14        | <b>-0.67</b> | -0.53                  | 0.51        | 0.36        |
| 16:0, 14-Me     | -0.04                     | -0.48        | NA     | 0.46                  | <b>0.77</b> | 0.61   | 0.36                  | <b>0.73</b> | 0.64   | -0.28                     | -0.18 | -0.39        | 0.28                  | 0.09  | 0.15        | -0.30                  | -0.43        | <b>-0.59</b> | -0.53                      | -0.51        | -0.58        | -0.10                  | 0.17        | 0.44        |
| 17:0, 16-Me     | -0.05                     | -0.30        | NA     | 0.64                  | 0.59        | 0.28   | 0.55                  | 0.65        | 0.23   | -0.52                     | -0.12 | <b>-0.67</b> | 0.33                  | 0.29  | 0.33        | -0.47                  | -0.51        | -0.14        | -0.57                      | -0.42        | <b>-0.64</b> | -0.18                  | 0.47        | 0.16        |
| 21:0, 18-Me     | 0.03                      | <b>-0.63</b> | NA     | 0.66                  | 0.63        | 0.19   | 0.61                  | 0.39        | -0.13  | -0.58                     | 0.06  | -0.27        | 0.24                  | 0.25  | <b>0.78</b> | -0.47                  | 0.00         | 0.15         | -0.62                      | -0.46        | -0.35        | 0.26                   | -0.17       | 0.45        |
| Total           | -0.04                     | -0.20        | NA     | <b>0.80</b>           | <b>0.72</b> | 0.26   | 0.64                  | <b>0.67</b> | 0.30   | -0.64                     | -0.04 | -0.45        | 0.23                  | 0.29  | 0.24        | -0.54                  | -0.53        | -0.35        | -0.57                      | -0.39        | -0.44        | 0.08                   | 0.61        | <b>0.69</b> |
| <b>MUFA</b>     |                           |              |        |                       |             |        |                       |             |        |                           |       |              |                       |       |             |                        |              |              |                            |              |              |                        |             |             |
| 16:1n-7, Z      | 0.05                      | -0.36        | NA     | 0.60                  | <b>0.67</b> | 0.51   | 0.52                  | <b>0.71</b> | 0.45   | -0.58                     | -0.15 | <b>-0.64</b> | 0.32                  | 0.24  | 0.20        | -0.41                  | <b>-0.68</b> | -0.44        | -0.54                      | -0.42        | <b>-0.71</b> | -0.12                  | 0.34        | 0.43        |
| 18:1n-9,E       | -0.23                     | -0.44        | NA     | <b>0.78</b>           | <b>0.79</b> | 0.09   | 0.63                  | <b>0.76</b> | 0.07   | -0.64                     | 0.07  | <b>-0.74</b> | 0.29                  | 0.32  | 0.39        | -0.48                  | -0.31        | 0.10         | -0.60                      | -0.38        | -0.62        | 0.03                   | 0.23        | 0.19        |
| 18:1n-9,Z       | -0.11                     | <b>-0.63</b> | NA     | 0.58                  | <b>0.69</b> | 0.29   | 0.31                  | 0.40        | 0.02   | -0.42                     | -0.03 | -0.47        | 0.31                  | 0.26  | <b>0.85</b> | -0.07                  | -0.12        | 0.00         | -0.33                      | -0.53        | -0.41        | -0.19                  | -0.12       | 0.26        |
| 18:1n-7, Z      | 0.06                      | -0.35        | NA     | 0.31                  | <b>0.87</b> | 0.46   | 0.17                  | 0.52        | 0.21   | -0.50                     | -0.09 | <b>-0.62</b> | 0.54                  | 0.14  | <b>0.71</b> | -0.13                  | -0.37        | -0.22        | -0.39                      | <b>-0.59</b> | <b>-0.58</b> | -0.33                  | 0.23        | 0.41        |
| 18:1n-6, Z      | 0.35                      | -0.04        | NA     | -0.16                 | 0.29        | 0.45   | -0.09                 | 0.56        | 0.23   | -0.22                     | 0.02  | -0.18        | 0.36                  | 0.41  | 0.09        | -0.06                  | <b>-0.61</b> | -0.35        | -0.07                      | -0.33        | -0.35        | -0.22                  | 0.37        | 0.51        |
| 20:1n-9         | -0.02                     | <b>-0.58</b> | NA     | <b>0.70</b>           | <b>0.66</b> | 0.22   | 0.60                  | 0.43        | -0.07  | -0.35                     | 0.05  | -0.34        | 0.02                  | 0.26  | <b>0.75</b> | <b>-0.55</b>           | 0.01         | 0.10         | -0.48                      | -0.38        | -0.41        | 0.23                   | -0.10       | 0.43        |
| 22:1n-9         | -0.52                     | 0.10         | NA     | 0.43                  | 0.08        | -0.04  | 0.31                  | 0.27        | 0.37   | -0.27                     | 0.31  | -0.43        | -0.10                 | -0.12 | -0.34       | -0.33                  | -0.02        | -0.17        | -0.20                      | 0.49         | -0.46        | 0.46                   | -0.08       | -0.10       |
| 24:1n-9         | -0.17                     | -0.35        | NA     | 0.53                  | 0.14        | -0.11  | 0.49                  | 0.37        | -0.04  | -0.39                     | 0.35  | -0.48        | 0.00                  | -0.16 | 0.24        | <b>-0.80</b>           | 0.12         | 0.28         | -0.22                      | 0.37         | <b>-0.57</b> | 0.14                   | -0.06       | 0.06        |
| Total           | -0.18                     | <b>-0.65</b> | NA     | <b>0.73</b>           | <b>0.69</b> | 0.31   | 0.46                  | 0.40        | 0.08   | -0.60                     | 0.04  | <b>-0.55</b> | 0.41                  | 0.23  | <b>0.79</b> | -0.32                  | -0.08        | -0.06        | -0.46                      | <b>-0.54</b> | -0.45        | -0.12                  | -0.10       | 0.32        |
| <b>n-6 PUFA</b> |                           |              |        |                       |             |        |                       |             |        |                           |       |              |                       |       |             |                        |              |              |                            |              |              |                        |             |             |
| 18:2, 9Z,11E    | 0.18                      | -0.24        | NA     | 0.31                  | 0.18        | -0.06  | 0.52                  | 0.24        | -0.13  | -0.29                     | -0.21 | -0.39        | -0.12                 | 0.09  | 0.33        | <b>-0.59</b>           | 0.06         | 0.35         | -0.28                      | -0.08        | -0.45        | 0.19                   | -0.06       | 0.02        |
| 18:2 Z/Z        | 0.35                      | 0.36         | NA     | -0.40                 | 0.22        | 0.06   | -0.17                 | 0.34        | 0.17   | 0.04                      | 0.14  | -0.32        | 0.22                  | 0.19  | -0.23       | 0.09                   | -0.43        | -0.19        | 0.22                       | -0.10        | -0.14        | -0.29                  | 0.10        | 0.22        |
| 18:2n-6, Z,Z    | 0.06                      | <b>-0.60</b> | NA     | 0.37                  | 0.52        | 0.35   | 0.09                  | 0.24        | 0.02   | -0.25                     | -0.18 | -0.32        | 0.21                  | 0.27  | <b>0.90</b> | 0.29                   | -0.04        | -0.05        | -0.07                      | <b>-0.54</b> | -0.32        | -0.23                  | -0.16       | 0.39        |
| 20:3n-6         | -0.35                     | <b>-0.55</b> | NA     | 0.49                  | <b>0.57</b> | -0.04  | 0.44                  | <b>0.58</b> | -0.14  | -0.53                     | 0.03  | -0.42        | 0.28                  | 0.19  | 0.48        | <b>-0.71</b>           | -0.16        | 0.34         | -0.46                      | -0.12        | -0.53        | 0.19                   | -0.04       | 0.22        |
| 20:4n-6         | 0.15                      | -0.35        | NA     | 0.25                  | 0.44        | -0.09  | 0.34                  | 0.37        | -0.27  | -0.10                     | -0.05 | -0.12        | -0.30                 | 0.04  | 0.46        | -0.52                  | 0.02         | 0.36         | -0.09                      | -0.29        | -0.23        | 0.47                   | -0.04       | 0.46        |
| 22:4n-6         | -0.21                     | -0.40        | NA     | 0.25                  | 0.35        | -0.03  | 0.14                  | 0.52        | -0.08  | -0.33                     | 0.15  | -0.04        | 0.19                  | 0.16  | 0.17        | <b>-0.73</b>           | 0.05         | 0.14         | -0.20                      | 0.11         | -0.18        | 0.27                   | 0.21        | -0.08       |
| 22:5n-6         | 0.02                      | -0.16        | NA     | 0.20                  | 0.01        | 0.07   | 0.14                  | -0.05       | -0.02  | -0.52                     | -0.36 | <b>-0.56</b> | 0.33                  | 0.01  | 0.48        | <b>-0.61</b>           | 0.28         | 0.21         | -0.19                      | -0.07        | <b>-0.62</b> | 0.04                   | -0.05       | 0.12        |
| Total           | -0.10                     | <b>-0.59</b> | NA     | 0.65                  | <b>0.68</b> | 0.23   | 0.36                  | 0.42        | -0.10  | -0.53                     | -0.08 | -0.32        | 0.15                  | 0.08  | <b>0.80</b> | -0.34                  | -0.10        | 0.13         | -0.29                      | -0.42        | -0.38        | 0.17                   | -0.07       | 0.41        |
| <b>n-3 PUFA</b> |                           |              |        |                       |             |        |                       |             |        |                           |       |              |                       |       |             |                        |              |              |                            |              |              |                        |             |             |
| 18:3n-3         | -0.01                     | <b>-0.70</b> | NA     | 0.37                  | 0.50        | 0.34   | 0.10                  | 0.16        | 0.01   | -0.22                     | -0.18 | -0.40        | 0.15                  | 0.31  | <b>0.89</b> | 0.28                   | 0.05         | -0.01        | -0.13                      | <b>-0.57</b> | -0.37        | -0.12                  | -0.29       | 0.31        |
| 20:5n-3         | 0.08                      | -0.12        | NA     | 0.24                  | 0.10        | -0.16  | 0.25                  | 0.45        | -0.02  | -0.37                     | 0.06  | -0.31        | -0.01                 | 0.02  | 0.12        | -0.32                  | -0.15        | 0.28         | -0.06                      | 0.26         | -0.32        | 0.12                   | 0.08        | -0.05       |
| 22:5n-3         | -0.06                     | -0.02        | NA     | 0.38                  | -0.16       | 0.24   | 0.13                  | 0.01        | 0.12   | -0.35                     | -0.05 | -0.31        | 0.37                  | -0.14 | 0.30        | -0.39                  | 0.08         | -0.10        | -0.28                      | 0.00         | -0.33        | 0.24                   | 0.22        | 0.51        |
| 22:6n-3         | -0.24                     | 0.30         | NA     | 0.33                  | -0.12       | -0.32  | 0.11                  | 0.09        | 0.06   | -0.35                     | 0.04  | -0.47        | 0.09                  | -0.22 | -0.43       | -0.13                  | 0.03         | 0.15         | -0.13                      | 0.52         | -0.39        | 0.45                   | -0.01       | -0.19       |
| Total           | 0.01                      | -0.53        | NA     | 0.46                  | 0.62        | 0.14   | 0.18                  | 0.21        | -0.12  | -0.39                     | -0.15 | -0.29        | 0.09                  | 0.06  | <b>0.73</b> | -0.04                  | 0.08         | 0.19         | -0.14                      | -0.42        | -0.40        | 0.23                   | -0.24       | 0.37        |
| <b>Total FA</b> | -0.04                     | <b>-0.64</b> | NA     | <b>0.76</b>           | 0.63        | 0.26   | 0.60                  | 0.27        | -0.01  | <b>-0.63</b>              | -0.07 | -0.43        | 0.40                  | 0.32  | <b>0.81</b> | -0.39                  | 0.00         | 0.05         | <b>-0.63</b>               | <b>-0.58</b> | -0.43        | -0.14                  | -0.12       | 0.32        |

AL, ad libitum; CTRL, control diet; HF, high fat diet; TRF, time-restricted feeding; FA, fatty acids; BCFA, branched chain fatty acids; MUFA, monounsaturated fatty acids; PUFA, polyunsaturated fatty acids; SFA, saturated fatty acids; NA, not applicable due to all zero relative abundance in HF-TRF.

**Supplemental Table S3.** Spearman's rho values for fecal microbial phyla by bile acids. Blue shading highlights statistically significant negative Spearman's Rho. Green shading indicates positive associations. Normal font indicates  $p < 0.05$ ; bold font indicates  $p < 0.01$ .

| Bile Acids                | Actinobacteria |             |       |        | Bacteroidetes |              |       |        | Deferribacteres |              |             |        | Firmicutes |       |             |        | Patescibacteria |       |             |        | Verrucomicrobia |       |              |        |
|---------------------------|----------------|-------------|-------|--------|---------------|--------------|-------|--------|-----------------|--------------|-------------|--------|------------|-------|-------------|--------|-----------------|-------|-------------|--------|-----------------|-------|--------------|--------|
|                           | CTRL-          | ΔI          | HF-AL | HF-TRF | CTRL-         | ΔI           | HF-AL | HF-TRF | CTRL-           | ΔI           | HF-AL       | HF-TRF | CTRL-      | ΔI    | HF-AL       | HF-TRF | CTRL-           | ΔI    | HF-AL       | HF-TRF | CTRL-           | ΔI    | HF-AL        | HF-TRF |
| α-MCA                     | -0.20          | 0.30        | 0.39  |        | 0.24          | -0.22        | -0.34 |        | -0.41           | -0.30        | <b>0.75</b> |        | -0.22      | 0.24  | <b>0.62</b> |        | -0.59           | -0.05 | 0.01        |        | -0.24           | 0.00  | <b>-0.56</b> |        |
| β/ω- MCA                  | -0.10          | -0.18       | 0.50  |        | 0.24          | 0.15         | -0.25 |        | -0.10           | -0.31        | 0.47        |        | -0.09      | 0.12  | 0.47        |        | -0.54           | -0.15 | -0.03       |        | -0.14           | -0.13 | -0.38        |        |
| DCA                       | 0.02           | 0.43        | -0.21 |        | 0.05          | -0.17        | -0.18 |        | -0.55           | -0.21        | 0.29        |        | -0.05      | 0.10  | 0.45        |        | 0.17            | 0.34  | 0.47        |        | -0.15           | 0.04  | <b>-0.66</b> |        |
| t-DCA                     | -0.11          | 0.48        | -0.28 |        | 0.25          | -0.09        | -0.53 |        | -0.24           | -0.43        | 0.39        |        | -0.29      | -0.25 | <b>0.58</b> |        | -0.31           | -0.02 | 0.11        |        | 0.07            | 0.45  | -0.05        |        |
| HDCA                      | 0.00           | 0.29        | -0.63 |        | -0.15         | 0.27         | 0.12  |        | -0.01           | -0.12        | -0.26       |        | 0.10       | -0.47 | -0.08       |        | 0.20            | 0.14  | 0.25        |        | -0.14           | 0.26  | -0.16        |        |
| t-HDCA                    | -0.07          | 0.41        | -0.62 |        | -0.16         | -0.17        | -0.31 |        | 0.22            | 0.09         | 0.10        |        | 0.10       | -0.19 | 0.39        |        | 0.08            | 0.16  | 0.35        |        | -0.07           | 0.19  | -0.43        |        |
| t-CDCA                    | -0.18          | 0.40        | -0.39 |        | -0.02         | -0.61        | -0.47 |        | 0.04            | 0.31         | 0.37        |        | -0.04      | 0.27  | <b>0.61</b> |        | 0.19            | 0.09  | 0.40        |        | 0.12            | -0.01 | -0.42        |        |
| LCA                       | 0.15           | 0.27        | -0.43 |        | -0.06         | -0.20        | -0.15 |        | -0.51           | 0.06         | -0.09       |        | -0.03      | 0.08  | 0.44        |        | 0.24            | -0.19 | 0.51        |        | -0.34           | 0.17  | -0.36        |        |
| CA                        | -0.27          | <b>0.68</b> | 0.22  |        | 0.08          | -0.02        | -0.36 |        | -0.23           | <b>-0.72</b> | <b>0.68</b> |        | -0.04      | -0.21 | <b>0.55</b> |        | -0.21           | -0.21 | -0.02       |        | 0.02            | 0.45  | -0.51        |        |
| α-t-CA                    | -0.23          | 0.62        | -0.27 |        | 0.09          | -0.59        | -0.52 |        | -0.02           | 0.05         | 0.27        |        | -0.08      | 0.25  | <b>0.69</b> |        | 0.06            | 0.11  | 0.30        |        | -0.02           | 0.10  | -0.51        |        |
| t-CA                      | -0.22          | 0.61        | -0.37 |        | 0.01          | <b>-0.72</b> | -0.40 |        | 0.18            | 0.09         | 0.31        |        | -0.04      | 0.42  | 0.52        |        | 0.08            | 0.15  | 0.43        |        | 0.14            | -0.02 | -0.42        |        |
| ω-t-CA                    | 0.25           | 0.06        | -0.11 |        | -0.29         | -0.48        | -0.52 |        | 0.33            | 0.28         | 0.08        |        | 0.19       | 0.35  | <b>0.73</b> |        | 0.01            | 0.09  | 0.11        |        | 0.12            | -0.02 | -0.40        |        |
| UDCA                      | 0.10           | 0.38        | -0.41 |        | 0.03          | <b>-0.66</b> | 0.30  |        | -0.52           | -0.05        | 0.07        |        | -0.01      | 0.50  | -0.09       |        | 0.10            | 0.14  | <b>0.58</b> |        | -0.18           | 0.16  | -0.39        |        |
| <b>Taurine conjugates</b> | -0.07          | 0.46        | -0.30 |        | -0.10         | <b>-0.71</b> | -0.54 |        | 0.21            | 0.20         | 0.18        |        | 0.06       | 0.38  | <b>0.69</b> |        | 0.03            | 0.10  | 0.26        |        | 0.08            | 0.07  | -0.41        |        |
| <b>Total bile acids</b>   | -0.13          | 0.21        | 0.00  |        | 0.22          | -0.07        | -0.24 |        | -0.41           | -0.36        | 0.49        |        | -0.16      | 0.15  | <b>0.60</b> |        | -0.27           | 0.17  | 0.41        |        | -0.17           | 0.04  | <b>-0.74</b> |        |

AL, *ad libitum*; CTRL, control diet; HF, high fat diet; TRF, time-restricted feeding; α-MCA, α-muricholic acid; β/ω muricholic acids; DCA, deoxycholic acid; t-DCA, taurine deoxycholic acid; HDCA, hyodeoxycholic acid; t-HDCA, taurine hyodeoxycholic acid; t-CDCA, taurine chenodeoxycholic acid; LCA, lithocholic acid; CA, cholic acid; α-t-cholic acid, alpha taurine cholic acid; t-CA, taurine cholic acid; ω-t-cholic acid, alpha taurine cholic acid; UDCA, ursodeoxycholic acid.

**Supplemental Table S4.** Spearman's rho for fecal microbial families by bile acids. Blue shading highlights statistically significant negative Spearman's Rho. Green shading indicates positive associations. Normal font indicates  $p < 0.05$ ; bold font indicates  $p < 0.01$ .

| Bile Acids          | <i>Clostridiales</i>      |             |        |                       |       |        |                       |       |        |                           |       |             |                    |       |             |                        |       |             |                       |       |        |                        |       |        |
|---------------------|---------------------------|-------------|--------|-----------------------|-------|--------|-----------------------|-------|--------|---------------------------|-------|-------------|--------------------|-------|-------------|------------------------|-------|-------------|-----------------------|-------|--------|------------------------|-------|--------|
|                     | <i>Bifidobacteriaceae</i> |             |        | <i>Bacteroidaceae</i> |       |        | <i>Tannerellaceae</i> |       |        | <i>Deferribacteraceae</i> |       |             | <i>Family XIII</i> |       |             | <i>Lachnospiraceae</i> |       |             | <i>Peptococcaceae</i> |       |        | <i>Akkermansiaceae</i> |       |        |
|                     | CTRL-AL                   | HF-AL       | HF-TRF | CTRL-AL               | HF-AL | HF-TRF | CTRL-AL               | HF-AL | HF-TRF | CTRL-AL                   | HF-AL | HF-TRF      | CTRL-AL            | HF-AL | HF-TRF      | CTRL-AL                | HF-AL | HF-TRF      | CTRL-AL               | HF-AL | HF-TRF | CTRL-AL                | HF-AL | HF-TRF |
| $\alpha$ -MCA       | -0.18                     | 0.11        | NA     | 0.24                  | -0.04 | -0.33  | 0.14                  | -0.19 | -0.51  | -0.41                     | -0.30 | <b>0.75</b> | -0.11              | -0.03 | 0.29        | -0.06                  | 0.41  | 0.53        | -0.12                 | -0.34 | 0.39   | -0.24                  | 0.00  | -0.56  |
| $\beta/\omega$ -MCA | -0.12                     | -0.43       | NA     | 0.12                  | 0.20  | -0.24  | 0.12                  | -0.10 | -0.34  | -0.10                     | -0.31 | 0.47        | -0.11              | 0.09  | 0.02        | 0.13                   | 0.43  | 0.32        | 0.12                  | -0.20 | 0.47   | -0.14                  | -0.13 | -0.38  |
| DCA                 | 0.08                      | 0.11        | NA     | 0.09                  | -0.05 | -0.20  | 0.16                  | 0.28  | -0.07  | -0.55                     | -0.21 | 0.29        | 0.00               | 0.23  | <b>0.69</b> | -0.34                  | -0.20 | 0.29        | 0.03                  | -0.66 | -0.27  | -0.15                  | 0.04  | -0.66  |
| t-DCA               | 0.03                      | 0.45        | NA     | 0.31                  | -0.12 | -0.37  | 0.34                  | 0.02  | -0.48  | -0.24                     | -0.43 | 0.39        | -0.01              | 0.33  | 0.28        | -0.23                  | -0.06 | <b>0.57</b> | 0.33                  | -0.40 | 0.32   | 0.07                   | 0.45  | -0.05  |
| HDCA                | 0.26                      | 0.37        | NA     | -0.03                 | 0.34  | 0.25   | 0.19                  | 0.46  | 0.22   | -0.01                     | -0.12 | -0.26       | -0.29              | -0.01 | 0.38        | 0.03                   | -0.78 | -0.02       | 0.00                  | -0.30 | -0.69  | -0.14                  | 0.26  | -0.16  |
| t-HDCA              | 0.17                      | <b>0.61</b> | NA     | -0.13                 | -0.16 | -0.21  | 0.11                  | 0.09  | -0.10  | 0.22                      | 0.09  | 0.10        | -0.15              | -0.05 | <b>0.69</b> | 0.09                   | -0.45 | 0.36        | 0.14                  | -0.07 | -0.42  | -0.07                  | 0.19  | -0.43  |
| t-CDCA              | -0.08                     | <b>0.64</b> | NA     | 0.05                  | -0.52 | -0.55  | 0.22                  | -0.25 | -0.66  | 0.04                      | 0.31  | 0.37        | -0.07              | 0.01  | <b>0.61</b> | -0.32                  | 0.09  | <b>0.66</b> | 0.18                  | -0.02 | 0.06   | 0.12                   | -0.01 | -0.42  |
| LCA                 | 0.17                      | 0.47        | NA     | 0.03                  | 0.03  | -0.23  | 0.10                  | 0.06  | -0.35  | -0.51                     | 0.06  | -0.09       | -0.13              | -0.13 | 0.29        | -0.34                  | -0.10 | 0.49        | -0.19                 | -0.14 | -0.34  | -0.34                  | 0.17  | -0.36  |
| CA                  | -0.22                     | 0.43        | NA     | -0.05                 | -0.08 | -0.12  | -0.04                 | -0.09 | -0.50  | -0.23                     | -0.72 | <b>0.68</b> | 0.23               | 0.51  | 0.22        | -0.24                  | -0.02 | 0.48        | 0.10                  | -0.35 | 0.22   | 0.02                   | 0.45  | -0.51  |
| $\alpha$ -t-CA      | -0.18                     | <b>0.67</b> | NA     | -0.04                 | -0.60 | -0.63  | 0.10                  | -0.37 | -0.61  | -0.02                     | 0.05  | 0.27        | 0.21               | 0.15  | 0.52        | -0.35                  | 0.04  | <b>0.66</b> | 0.22                  | -0.10 | 0.06   | -0.02                  | 0.10  | -0.51  |
| t-CA                | -0.15                     | <b>0.61</b> | NA     | -0.14                 | -0.74 | -0.56  | 0.02                  | -0.55 | -0.41  | 0.18                      | 0.09  | 0.31        | 0.25               | 0.16  | <b>0.62</b> | -0.23                  | 0.19  | 0.48        | 0.49                  | -0.16 | 0.05   | 0.14                   | -0.02 | -0.42  |
| $\omega$ -t-CA      | 0.21                      | 0.24        | NA     | -0.27                 | -0.22 | -0.59  | -0.14                 | -0.24 | -0.70  | 0.33                      | 0.28  | 0.08        | 0.02               | -0.07 | 0.35        | -0.07                  | 0.31  | <b>0.75</b> | <b>0.70</b>           | 0.10  | 0.21   | 0.12                   | -0.02 | -0.40  |
| UDCA                | 0.21                      | 0.35        | NA     | 0.07                  | -0.66 | 0.06   | 0.19                  | -0.70 | 0.44   | -0.52                     | -0.05 | 0.07        | -0.01              | -0.02 | 0.45        | -0.20                  | 0.50  | -0.28       | -0.04                 | -0.34 | -0.13  | -0.18                  | 0.16  | -0.39  |
| Taurine conjugated  | -0.04                     | <b>0.64</b> | NA     | -0.13                 | -0.59 | -0.66  | -0.02                 | -0.47 | -0.63  | 0.21                      | 0.20  | 0.18        | 0.04               | 0.04  | 0.51        | -0.21                  | 0.23  | <b>0.69</b> | <b>0.57</b>           | -0.04 | 0.13   | 0.08                   | 0.07  | -0.41  |
| Total fecal BA      | 0.00                      | -0.08       | NA     | 0.20                  | 0.14  | -0.19  | 0.32                  | 0.02  | -0.24  | -0.41                     | -0.36 | 0.49        | -0.10              | 0.08  | <b>0.55</b> | -0.17                  | 0.18  | 0.44        | 0.18                  | -0.66 | -0.08  | -0.17                  | 0.04  | -0.74  |

AL, *ad libitum*; CTRL, control diet; HF, high fat diet; TRF, time-restricted feeding;  $\alpha$ -MCA,  $\alpha$ -muricholic acid;  $\beta/\omega$  muricholic acids; DCA, deoxycholic acid; t-DCA, taurine deoxycholic acid; HDCA, hyodeoxycholic acid; t-HDCA, taurine hyodeoxycholic acid; t-CDCA, taurine chenodeoxycholic acid; LCA, lithocholic acid; CA, cholic acid;  $\alpha$ -t-cholic acid, alpha taurine cholic acid; t-CA, taurine cholic acid;  $\omega$ -t-cholic acid, alpha taurine cholic acid; UDCA, ursodeoxycholic acid; NA, not applicable due to all zero relative abundance in HF-TRF.

**Supplemental Table S5.** Spearman's rho values for fecal microbial phyla by short chain fatty acids. SCFA, short chain fatty acids. Blue shading highlights statistically significant negative Spearman's Rho. Green shading indicates positive associations. Normal font indicates  $p < 0.05$ ; bold font indicates  $p < 0.01$ .

| Phylum            | Actinobacteria |       |        | Bacteroidetes |       |        | Cyanobacteria |       |        | Deferribacteres |       |        | Firmicutes  |       |        | Verrucomicrobia |       |        |
|-------------------|----------------|-------|--------|---------------|-------|--------|---------------|-------|--------|-----------------|-------|--------|-------------|-------|--------|-----------------|-------|--------|
| SCFA              | CTRL-<br>AL    | HF-AL | HF-TRF | CTRL-<br>AL   | HF-AL | HF-TRF | CTRL-<br>AL   | HF-AL | HF-TRF | CTRL-<br>AL     | HF-AL | HF-TRF | CTRL-<br>AL | HF-AL | HF-TRF | CTRL-<br>AL     | HF-AL | HF-TRF |
| % Acetate         | 0.53           | 0.54  | -0.21  | -0.54         | -0.43 | -0.14  | -0.34         | -0.05 | -0.37  | 0.10            | -0.05 | -0.32  | 0.45        | 0.26  | 0.23   | -0.34           | -0.01 | -0.42  |
| % Propionate      | -0.33          | 0.12  | 0.22   | 0.45          | 0.16  | 0.11   | 0.10          | -0.14 | 0.60   | 0.09            | -0.06 | 0.34   | -0.42       | -0.24 | -0.39  | 0.38            | 0.22  | 0.62   |
| % Butyrate        | -0.51          | -0.64 | 0.15   | 0.62          | 0.36  | 0.16   | 0.21          | 0.13  | 0.27   | -0.30           | 0.02  | 0.27   | -0.58       | -0.18 | -0.12  | 0.36            | 0.01  | 0.20   |
| acetate           | 0.22           | 0.01  | 0.13   | 0.48          | 0.01  | 0.12   | -0.13         | 0.07  | 0.18   | -0.42           | 0.06  | 0.19   | -0.58       | -0.27 | -0.07  | 0.01            | 0.31  | 0.20   |
| propionate        | -0.23          | 0.12  | 0.19   | 0.63          | 0.05  | 0.23   | 0.10          | -0.07 | 0.46   | -0.15           | -0.07 | 0.31   | -0.63       | -0.25 | -0.27  | 0.26            | 0.32  | 0.37   |
| butyrate          | -0.12          | -0.41 | 0.19   | 0.64          | 0.28  | 0.22   | 0.13          | 0.17  | 0.25   | -0.31           | 0.06  | 0.24   | -0.65       | -0.32 | -0.16  | 0.19            | 0.13  | 0.19   |
| isobutyrate       | -0.09          | 0.16  | 0.14   | 0.68          | -0.09 | 0.30   | 0.15          | -0.08 | 0.07   | -0.32           | 0.02  | 0.07   | -0.53       | -0.12 | -0.15  | 0.12            | 0.42  | -0.10  |
| isovalerate       | -0.24          | 0.25  | 0.11   | 0.63          | -0.26 | 0.32   | 0.48          | 0.15  | -0.11  | -0.32           | 0.13  | -0.16  | -0.45       | -0.03 | -0.08  | 0.03            | 0.32  | -0.20  |
| valerate          | 0.04           | 0.05  | 0.17   | 0.59          | 0.02  | 0.22   | -0.03         | 0.10  | 0.00   | -0.41           | -0.08 | 0.14   | -0.63       | -0.29 | -0.02  | 0.11            | 0.49  | -0.15  |
| <b>Total SCFA</b> | 0.06           | -0.01 | 0.16   | 0.59          | 0.07  | 0.21   | -0.09         | 0.09  | 0.21   | -0.40           | 0.04  | 0.23   | -0.66       | -0.30 | -0.15  | 0.08            | 0.29  | 0.19   |

AL, *ad libitum*; CTRL, control; HF, high fat diet; TRF, time-restricted feeding; SCFA, short chain fatty acids.
